# Supplementary material for: In plants, expression breadth and expression level distinctly and non-linearly correlate with gene structure
Source: Springer Nature journal article supplement (doi:10.1186/1745-6150-4-45), 2009-01-01
Supplement: Additional file 1 [file 1745-6150-4-45-s1.pdf]

**Table S1 - The correlations between expression pattern and sequence structural parameters for *Arabidopsis* and rice genes.**

| Parameters                   | Arabidopsis              |                          |               | Rice                     |                          |               |
|------------------------------|--------------------------|--------------------------|---------------|--------------------------|--------------------------|---------------|
|                              | <i>Exp<sub>tot</sub></i> | <i>Exp<sub>avg</sub></i> | <i>Width</i>  | <i>Exp<sub>tot</sub></i> | <i>Exp<sub>avg</sub></i> | <i>Width</i>  |
| Length of primary transcript | 0.187                    | -0.091                   | 0.288         | 0.139                    | 0.134                    | 0.234         |
|                              |                          | <b>-0.228</b>            | <b>0.286</b>  |                          | <b>-0.100</b>            | <b>0.216</b>  |
| Length of CDS                | -0.027                   | -0.184                   | 0.048         | -0.064                   | -0.071                   | 0.012*        |
|                              |                          | <b>-0.203</b>            | <b>0.090</b>  |                          | <b>-0.136</b>            | <b>0.116</b>  |
| Average exon length          | -0.142                   | -0.065                   | -0.184        | -0.188                   | -0.167                   | -0.220        |
|                              |                          | 0.038***                 | <b>-0.215</b> |                          | -0.0005*                 | <b>-0.157</b> |
| Average intron length        | 0.205                    | 0.071                    | 0.251         | 0.161                    | 0.165                    | 0.222         |
|                              |                          | <b>-0.054</b>            | <b>0.225</b>  |                          | -0.033***                | <b>0.157</b>  |
| Number of introns            | 0.221                    | -0.002*                  | 0.303         | 0.272                    | 0.260                    | 0.343         |
|                              |                          | <b>-0.151</b>            | <b>0.282</b>  |                          | -0.032***                | <b>0.228</b>  |
| Intron density               | 0.266                    | 0.102                    | 0.321         | 0.317                    | 0.307                    | 0.360         |
|                              |                          | <b>-0.058</b>            | <b>0.286</b>  |                          | 0.027***                 | <b>0.194</b>  |
| Total intron length          | 0.243                    | 0.016*                   | 0.333         | 0.259                    | 0.254                    | 0.343         |
|                              |                          | <b>-0.158</b>            | <b>0.320</b>  |                          | <b>-0.046</b>            | <b>0.240</b>  |
| 5' UTR length                | 0.472                    | 0.146                    | 0.507         | 0.112                    | 0.113                    | 0.184         |
|                              |                          | <b>-0.052</b>            | <b>0.331</b>  |                          | <b>-0.048</b>            | <b>0.153</b>  |
| 3' UTR length                | 0.473                    | 0.145                    | 0.509         | 0.217                    | 0.199                    | 0.260         |
|                              |                          | <b>-0.055</b>            | <b>0.336</b>  |                          | -0.003*                  | <b>0.165</b>  |
| 5' intergenic length         | -0.078                   | -0.022**                 | -0.124        | 0.009*                   | -0.011*                  | -0.013**      |
|                              |                          | <b>0.066</b>             | <b>-0.167</b> |                          | 0.038***                 | -0.039***     |
| 3' intergenic length         | -0.129                   | -0.011*                  | -0.167        | -0.099                   | -0.089                   | -0.120        |
|                              |                          | <b>0.062</b>             | <b>-0.142</b> |                          | 0.012*                   | <b>-0.078</b> |

For each structural parameter, the first line shows Spearman's rank sum correlation coefficients with expression pattern, while the second line shows Spearman's partial correlations. Controlled variable for the columns of *Exp<sub>avg</sub>* is expression width and that for the columns of *Width* is average expression level. Intron density was defined as the ratio of intron number to coding sequence length, i.e. the number of introns per coding base for each gene. *Exp<sub>tot</sub>*, total expression level; *Exp<sub>avg</sub>*, average expression level; *Width*, expression breadth. CDS, Coding Sequence; UTR, Untranslated Region. Level of significance: \*,  $P > 0.05$ ; \*\*,  $0.001 < P < 0.05$ ; \*\*\*,  $1e - 10 < P < 1e - 3$ ; No asterisks indicates  $P < 1e - 10$ . Numbers in bold indicate highly significant partial correlations ( $P < 1e - 10$ ).
