# Supplementary material for: In plants, expression breadth and expression level distinctly and non-linearly correlate with gene structure
Source: Springer Nature journal article supplement (doi:10.1186/1745-6150-4-45), 2009-01-01
Supplement: Additional file 11 [file 1745-6150-4-45-s11.pdf]

**Table S6 - The correlations between expression pattern and sequence structural parameters for *Arabidopsis* and rice genes.**

| Parameters                   | Arabidopsis              |               | Rice                     |              |
|------------------------------|--------------------------|---------------|--------------------------|--------------|
|                              | <i>Exp<sub>avg</sub></i> | <i>Width</i>  | <i>Exp<sub>avg</sub></i> | <i>Width</i> |
| Length of primary transcript | -0.019**                 | -0.001*       | 0.065                    | 0.085        |
|                              | <b>-0.194</b>            | <b>0.193</b>  | <b>-0.148</b>            | <b>0.158</b> |
| Length of CDS                | -0.183                   | -0.167        | -0.094                   | -0.086       |
|                              | <b>-0.178</b>            | <b>0.161</b>  | <b>-0.068</b>            | <b>0.057</b> |
| Number of introns            | 0.107                    | 0.120         | 0.091                    | 0.101        |
|                              | <b>-0.125</b>            | <b>0.135</b>  | <b>-0.076</b>            | <b>0.088</b> |
| Average exon length          | -0.157                   | -0.160        | -0.056                   | -0.061       |
|                              | 0.021**                  | -0.036***     | 0.034***                 | -0.041       |
| Average intron length        | 0.173                    | 0.178         | -0.014**                 | -0.007*      |
|                              | <b>-0.043</b>            | <b>0.060</b>  | <b>-0.055</b>            | <b>0.054</b> |
| Intron density               | 0.181                    | 0.185         | 0.169                    | 0.175        |
|                              | <b>-0.059</b>            | <b>0.077</b>  | <b>-0.036***</b>         | <b>0.057</b> |
| Total intron length          | 0.137                    | 0.150         | 0.067                    | 0.080        |
|                              | <b>-0.124</b>            | <b>0.137</b>  | <b>-0.104</b>            | <b>0.113</b> |
| 5' UTR length                | 0.288                    | 0.297         | 0.054                    | 0.066        |
|                              | <b>-0.083</b>            | <b>0.112</b>  | <b>-0.095</b>            | <b>0.102</b> |
| 3' UTR length                | 0.339                    | 0.346         | 0.092                    | 0.104        |
|                              | <b>-0.064</b>            | <b>0.099</b>  | <b>-0.099</b>            | <b>0.111</b> |
| 5' intergenic length         | -0.049                   | -0.054        | 0.021***                 | 0.020**      |
|                              | <b>0.052</b>             | <b>-0.057</b> | 0.010*                   | -0.007*      |
| 3' intergenic length         | -0.069                   | -0.076        | -0.058                   | -0.061       |
|                              | <b>0.067</b>             | <b>-0.074</b> | 0.019**                  | -0.026***    |

*Exp<sub>avg</sub>* was calculated as follows: genes were separately sorted according to their expression levels in each library; the ranks for each gene were then averaged to give the value of *Exp<sub>avg</sub>*. Notably, in each library, a gene was taken as expressed only when  $\geq 5$  tags could be mapped onto it. For each structural parameter, the first line shows Spearman's rank sum correlations with expression pattern, while the second line shows Spearman's partial correlations. Controlled variable for the columns of *Exp<sub>avg</sub>* is expression width and that for the columns of *Width* is average expression level. Intron density was calculated as the ratio of intron number to CDS length, i.e. intron number per coding base. CDS, Coding Sequence; UTR, Untranslated Region. Level of significance: \*,  $P > 0.05$ ; \*\*,  $0.001 < P < 0.05$ ; \*\*\*,  $1e-10 < P < 1e-3$ ; No asterisks indicates  $P < 1e-10$ . Numbers in bold indicate highly significant partial correlations ( $P < 1e-10$ ).
